# Supplementary material
Source: publisher figshare collection journal article supplement (https://f1000.figshare.com/ndownloader/files/1306005)
Supplement: Supplementary file 1 [file 1306005]

UT	GST	S3ED
100	97.56	53.21
98	100	62.56
99	98.2	58.4
